# Supplementary material for: A parameterization of sulfuric acid-dimethylamine nucleation and its application in three-dimensional modeling
Source: Copernicus journal article supplement (doi:10.5194/acp-2023-15), 2023-01-31
Supplement: Supplementary file 1 [file acp-2023-15-supplement.pdf]

# Supplementary Information

of

## A parameterization of sulfuric acid-dimethylamine nucleation and its application in three-dimensional modeling

Yuyang Li<sup>1, #</sup>, Jiewen Shen<sup>1, 2, #</sup>, Bin Zhao<sup>1, 2, \*</sup>, Runlong Cai<sup>3</sup>, Shuxiao Wang<sup>1, 2</sup>, Yang Gao<sup>4</sup>, Manish Shrivastava<sup>5</sup>, Da Gao<sup>1, 2</sup>, Jun Zheng<sup>6</sup>, Markku Kulmala<sup>2, 7, 8</sup>, Jingkun Jiang<sup>1, \*</sup>

<sup>1</sup>State Key Joint Laboratory of Environment Simulation and Pollution Control, School of Environment, Tsinghua University, 100084 Beijing, China

<sup>2</sup>State Environmental Protection Key Laboratory of Sources and Control of Air Pollution Complex, Beijing, 100084, China

<sup>3</sup>Institute for Atmospheric and Earth System Research/Physics, Faculty of Science, University of Helsinki, 00014 Helsinki, Finland

<sup>4</sup>Key Laboratory of Marine Environment and Ecology, Ministry of Education, Ocean University of China, Qingdao 266100, China

<sup>5</sup>Brian Gaudet, Pacific Northwest National Laboratory, Richland, Washington, USA

<sup>6</sup>School of Environmental Science and Engineering, Nanjing University of Information Science & Technology, Nanjing 210044, China

<sup>7</sup>Aerosol and Haze Laboratory, Beijing Advanced Innovation Center for Soft Matter Science and Engineering, Beijing University of Chemical Technology, 100029 Beijing, China

<sup>8</sup>Joint International Research Laboratory of Atmospheric and Earth System Sciences, School of Atmospheric Sciences, Nanjing University, Nanjing, China

<sup>#</sup> These authors contributed equally

<sup>\*</sup> Correspondence to: Bin Zhao (bzhaob@mail.tsinghua.edu.cn) and Jingkun Jiang (jiangjk@tsinghua.edu.cn)

24 **1** Lookup table for necessary parameters

25 **Table S1. Lookup table for  $G(i,j)$  and  $H(i)$  in the parameterization**

| $G(i,j)$ |   | $i$  |      |      |      |      |      |      | 26 |
|----------|---|------|------|------|------|------|------|------|----|
|          |   | 1    | 2    | 3    | 4    | 5    | 6    | 7    | 27 |
| $j$      | 1 | 0.71 | 0.96 | 0.86 | 0.91 | 1.01 | 1.15 | 1.28 |    |
|          | 2 | 0.96 | 1.20 | 1.20 | 1.31 | 1.47 | 1.70 | 1.90 |    |
|          | 3 | 0.86 | 1.20 | 1.00 | 1.01 | 1.11 | 1.22 | 1.32 |    |
|          | 4 | 0.91 | 1.31 | 1.01 | 0.99 | 1.06 | 1.13 | 1.20 |    |
|          | 5 | 1.01 | 1.47 | 1.11 | 1.06 | 1.12 | 1.18 | 1.24 |    |
|          | 6 | 1.15 | 1.70 | 1.22 | 1.13 | 1.18 | 1.20 | 1.24 |    |
|          | 7 | 1.28 | 1.90 | 1.32 | 1.20 | 1.24 | 1.24 | 1.26 |    |
| $H(i)$   |   | 1.00 | 0.89 | 0.63 | 0.51 | 0.43 | 0.34 | 0.29 |    |

## 28 2 Derivation of the Explicit Formula

29 Based on the kinetic model presented by Cai et al. (Cai et al., 2021), the formula of pseudo-steady-state cluster concentrations  
30 and nucleation rates is as follows:

$$31 [A_1B_1] = [SA_{tot}] - [A], \quad (S1)$$

$$32 [A_1B_1] = \frac{\beta_{1-2}[A][B]}{\beta_{1-3}[A] + \beta_{3-3}[A_1B_1] + \beta_{3-5}[A_2B_2] + \beta_{3-6}[A_3B_3] + \beta_{3-7}[A_4B_4] + CoagS_3 + \gamma}, \quad (S2)$$

$$33 [A_2B_1] = \frac{\beta_{1-3}[A][A_1B_1]}{\beta_{2-4}[B] + CoagS_4}, \quad (S3)$$

$$34 [A_2B_2] = \frac{\frac{1}{2}\beta_{3-3}[A_1B_1][A_1B_1] + \beta_{2-4}[A_2B_1][B]}{\beta_{3-5}[A_1B_1] + \beta_{5-5}[A_2B_2] + CoagS_5}, \quad (S4)$$

$$35 [A_3B_3] = \frac{\beta_{3-5}[A_2B_2][A_1B_1]}{\beta_{3-6}[A_1B_1] + CoagS_6}, \quad (S5)$$

$$36 [A_4B_4] = \frac{\beta_{3-6}[A_3B_3][A_1B_1] + \frac{1}{2}\beta_{5-5}[A_2B_2][A_2B_2]}{\beta_{3-7}[A_1B_1] + CoagS_7}, \quad (S6)$$

$$37 J_{A_4B_4} = \beta_{3-6}[A_3B_3][A_1B_1] + \frac{1}{2}\beta_{5-5}[A_2B_2][A_2B_2], \quad (S7)$$

38 where  $[SA_{tot}]$  represents the concentrations of sulfuric acid (SA) molecules or clusters containing one SA molecule,  $A$  is SA  
39 molecules,  $B$  is dimethylamine (DMA) molecules, and  $A_mB_n$  is the clusters consisting of  $m$  SA molecules and  $n$  DMA  
40 molecules.  $\beta_{i-j}$  ( $m^3 s^{-1}$ ) represents the collision coefficients ( $\beta$ ) between molecules or clusters  $i$  and  $j$ , and 1-7 represent  $A$ ,  $B$ ,  
41  $A_1B_1$ ,  $A_2B_1$ ,  $A_2B_2$ ,  $A_3B_3$ , and  $A_4B_4$ , respectively. Similarly,  $CoagS_i$  represents the coagulation sinks of molecules or clusters  $i$ .  $\gamma$   
42 ( $s^{-1}$ ) is the evaporation rate of  $A_1B_1$  clusters. Here the concentrations of clusters are shown as  $[A_mB_n]$  in  $m^{-3}$ .

43 The analytical solution should be simplified based on proper approximations. For typical polluted urban areas, the sink of  $A_1B_1$   
44 is mainly due to the coagulation scavenging and evaporation, that is,

$$45 [A_1B_1] \approx \frac{\beta_{1-2}[A][B]}{CoagS_3 + \gamma}, \quad (S8)$$

46 however, for a wider range of atmospheric environments with lower CS and temperatures, the above approximations might  
47 lead to an overestimation of SA-DMA nucleation rates. Thus in this study, the self-coagulation of  $A_1B_1$  and coagulation with  
48  $A$  would also be taken into account as a sink of  $A_1B_1$ :

$$49 [A_1B_1] \approx \frac{\beta_{1-2}[A][B]}{\beta_{1-3}[A] + \beta_{3-3}[A_1B_1] + CoagS_3 + \gamma} \approx \frac{\beta_{1-2}[A][B]}{\beta_{1-3}[SA_{tot}] + CoagS_3 + \gamma}, \quad (S9)$$

50 Putting the above assumption together with the pseudo-steady-state nucleation rates formula, the explicit formula could be  
51 simplified to the version in the main text (Eqs. 8-11).

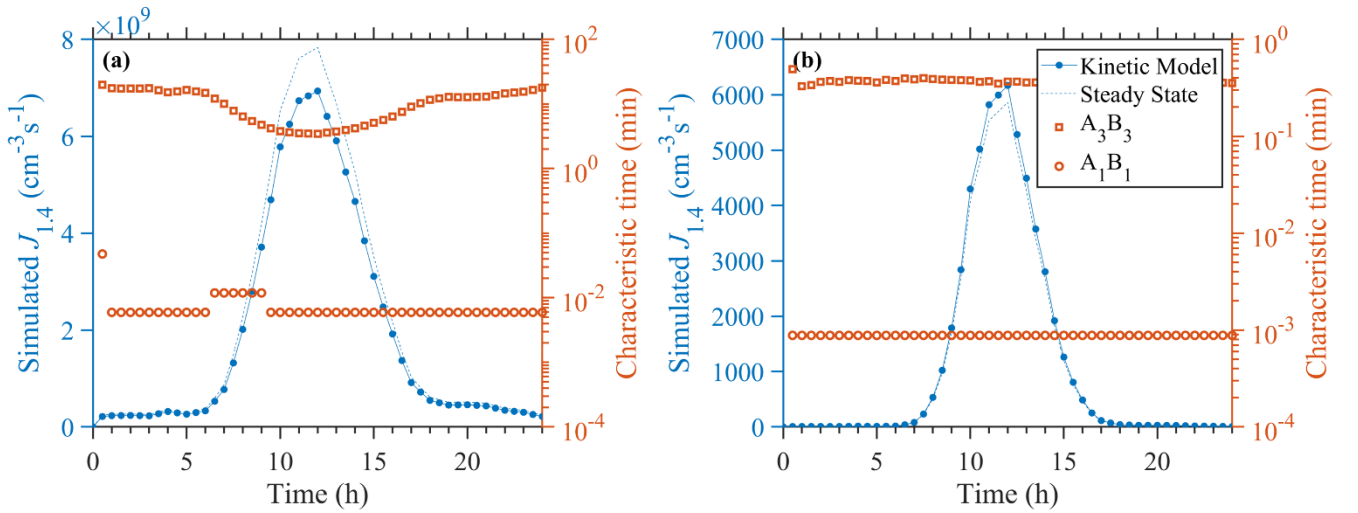

53 **Figure S1. Simulated  $J_{1.4}$  (blue) and characteristic equilibrium time (red) of  $A_3B_3$  and  $A_1B_1$ .** The typical conditions are  
54  $[DMA]=3.0$  pptv with  $CS=0.0001 s^{-1}$  and  $T=255 K$  in (a) and  $CS=0.01 s^{-1}$  and  $T=315 K$  in (b). The variation of SA  
55 concentrations is equal to the averaged diurnal variations.

### 56 3 Dimethylamine Emission inventory for marine area

57 Similar to the continental emission inventory for DMA, the maritime part is also built by combination of NH<sub>3</sub> emission  
58 inventory and DMA/NH<sub>3</sub> emission ratio. The maritime NH<sub>3</sub> emission is adopted from the results of Paulot et al with a grid  
59 transformation. The DMA/NH<sub>3</sub> emission ratio is estimated by the measured data from a previous study (Chen et al., 2021).  
60 During their maritime campaign, mean gaseous DMA and NH<sub>3</sub> concentrations are 0.006 µg cm<sup>-3</sup> and 0.5300 µg cm<sup>-3</sup>, of which  
61 16% and 34% come from continental transport, respectively. Hence we can obtain the marine-originated DMA (0.0050 µg cm<sup>-3</sup>)  
62 and NH<sub>3</sub> (0.34980 µg cm<sup>-3</sup>) concentrations and an approximate DMA/NH<sub>3</sub> emission ratio of 0.0144.

63 **Table S2. Key parameters in simulating atmospheric sinks of dimethylamine**

| Sinks                                                                                 | This study               | Variation range                                                                         |
|---------------------------------------------------------------------------------------|--------------------------|-----------------------------------------------------------------------------------------|
| Wet deposition<br>(Henry Law's constant/mol m <sup>-3</sup> Pa <sup>-1</sup> )        | 0.56                     | 0.3-0.6 (Sander, 2015)                                                                  |
| Gas-phase reaction<br>(•OH oxidation rate constant/cm <sup>-3</sup> s <sup>-1</sup> ) | 6.49 × 10 <sup>-11</sup> | (5.85-7.13) × 10 <sup>-11</sup><br>(Carl and Crowley, 1998)                             |
| Aerosol uptake<br>(Uptake coefficient)                                                | 0.001                    | 5.9 × 10 <sup>-4</sup> -4.4 × 10 <sup>-2</sup><br>(Qiu et al., 2011; Wang et al., 2010) |

64

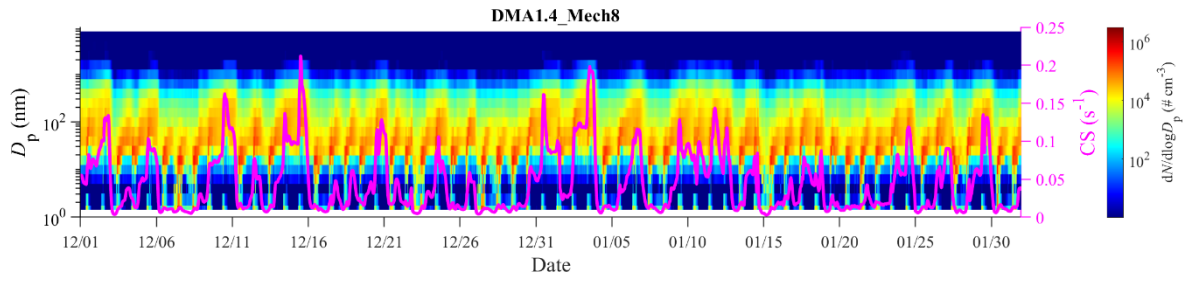

66  
67 **Figure S2. Simulated Evolution of PNSDs and Timeseries of CS (violet line) from scenario DMA1.4\_Mech8.**

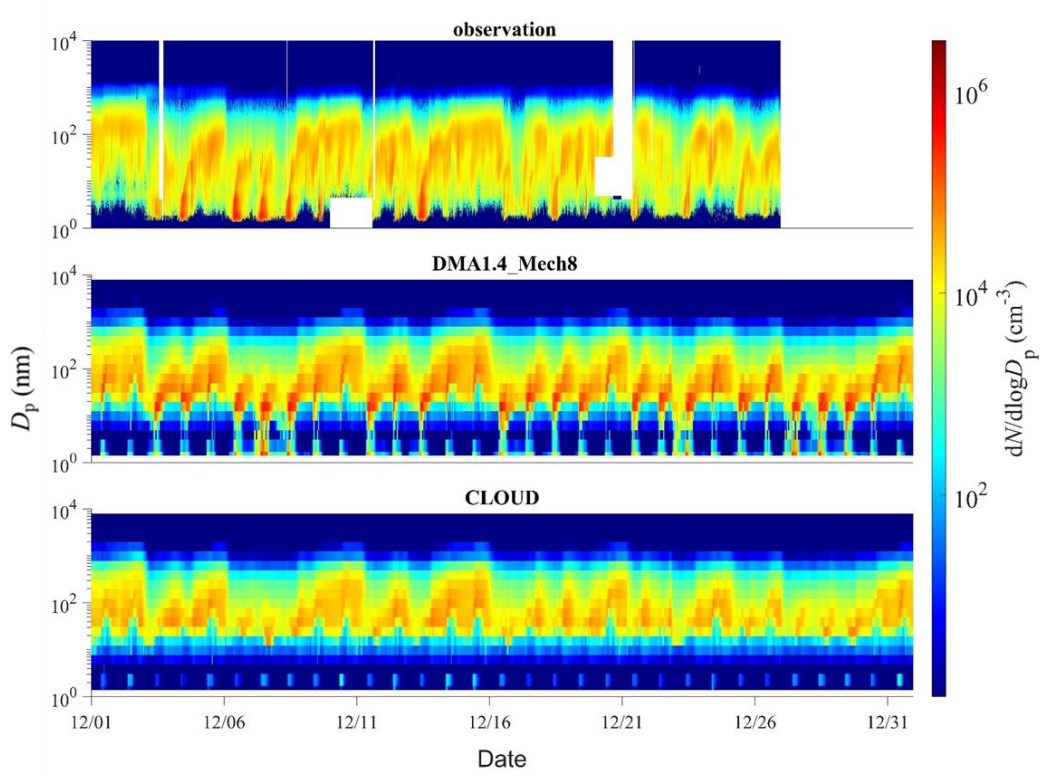

69  
70 Figure S3. Comparison of observed and simulated averaged particle number size distribution from scenarios with  
71 parameterizations from Dunne et al., 2016 (CLOUD) the original scenario (DMA1.4\_Mech8).

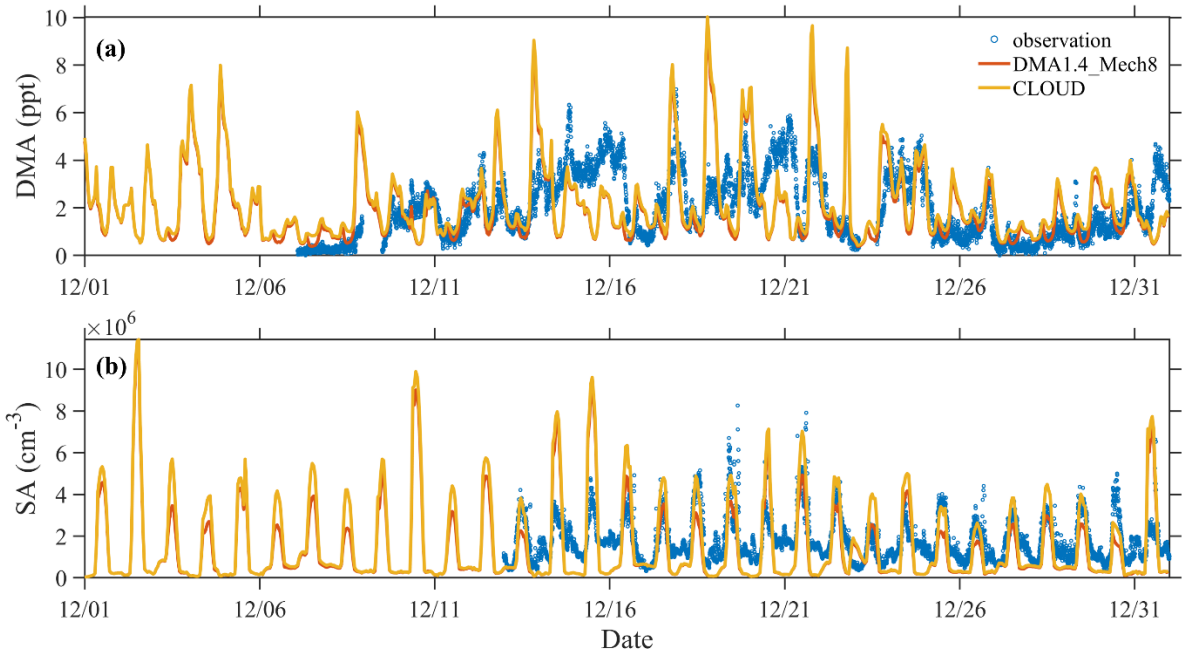

72  
 73 **Figure S4. Comparison of observed and simulated DMA (a) and SA (b) concentrations from scenarios with**  
 74 **parameterizations from Dunne et al., 2016 (CLOUD) the original scenario (DMA1.4\_Mech8).**

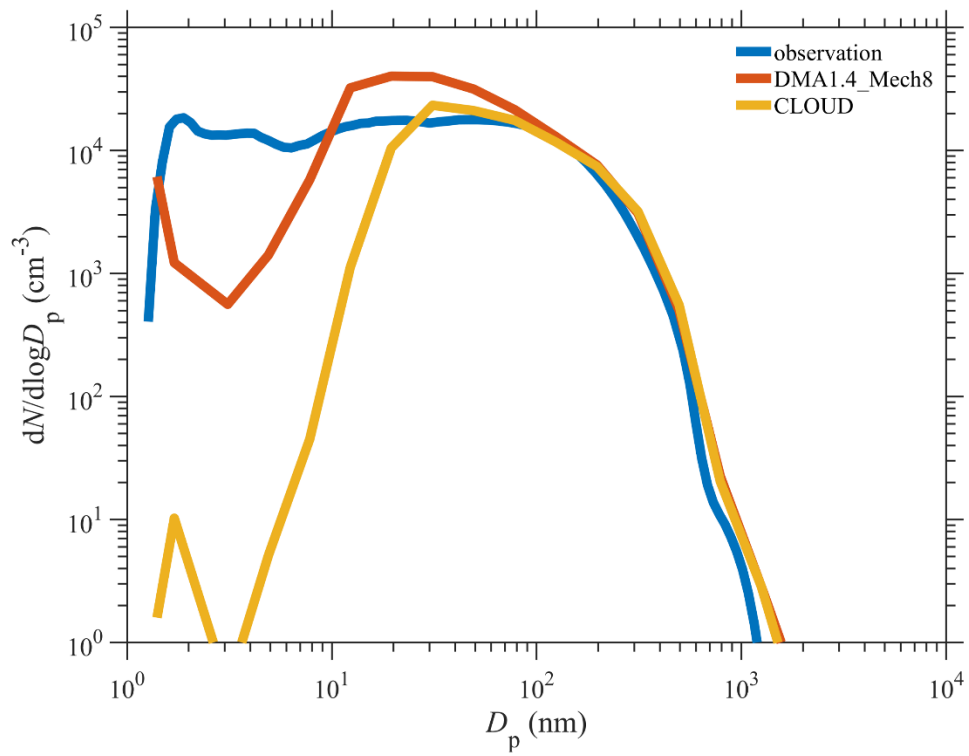

75

76 **Figure S5. Comparison of observed and simulated averaged particle number size distribution from scenarios with**  
 77 **parameterizations from Dunne et al., 2016 (CLOUD) the original scenario (DMA1.4\_Mech8).**



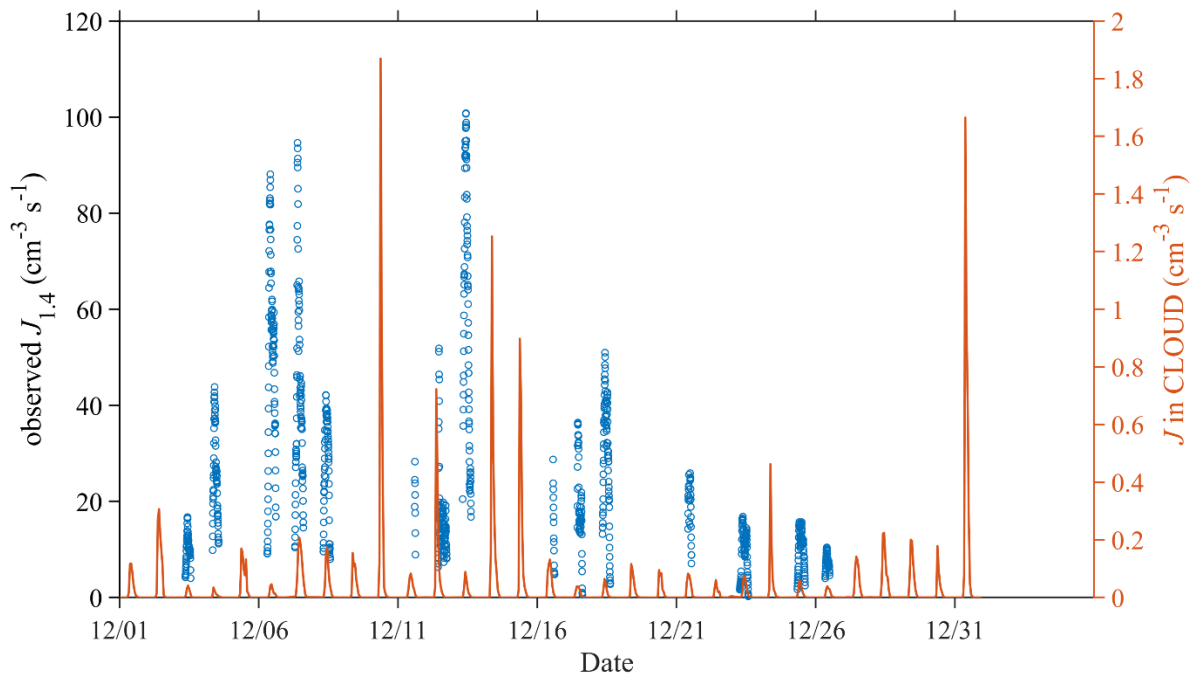

78

79 **Figure S6. Comparison of observed  $J_{1,4}$  and simulated nucleation rates from scenarios with parameterizations from**  
 80 **Dunne et al., 2016 (CLOUD).**

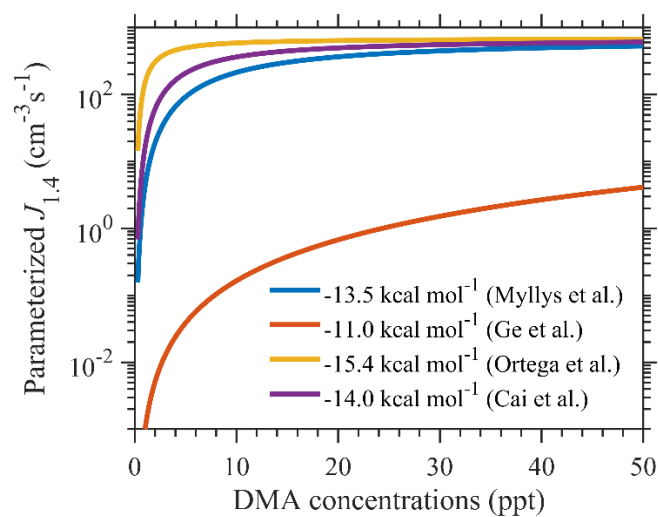

82  
83 **Figure S7. Variation of parameterized  $J_{1.4}$  with DMA concentrations at 281 K with different  $\Delta G$  values applied of -**  
84 **15.40, -14.00, -13.54, and -11.02 kcal mol<sup>-1</sup>, respectively.**

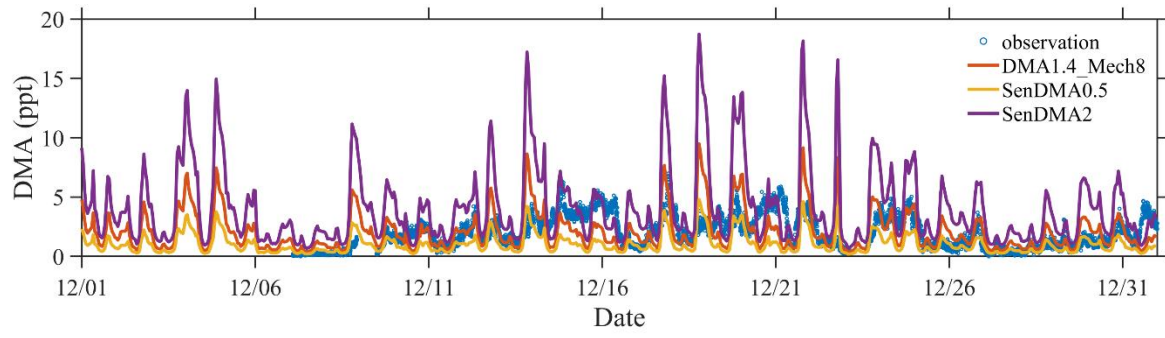

85  
86 **Figure S8. Comparison of observed and simulated DMA concentrations from sensitivity scenarios of halving**  
87 **(SenDMA0.5) and doubling (SenDMA2) the DMA emission and the original scenario (DMA1.4\_Mech8).**

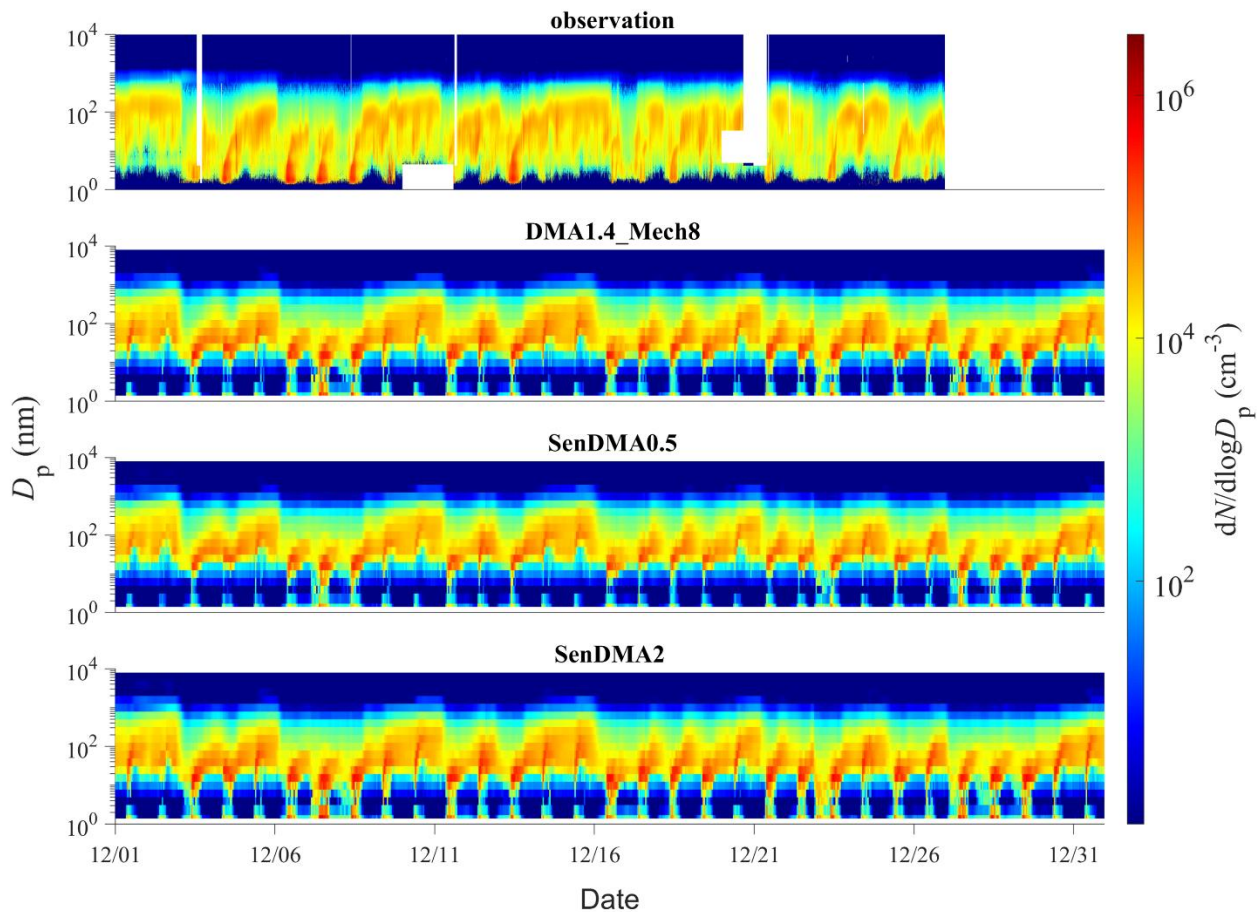

88

89 **Figure S9. Comparison of observed and simulated particle number size distribution from sensitivity scenarios of**  
 90 **halving (SenDMA0.5) and doubling (SenDMA2) the DMA emission and the original scenario (DMA1.4\_Mech8).**

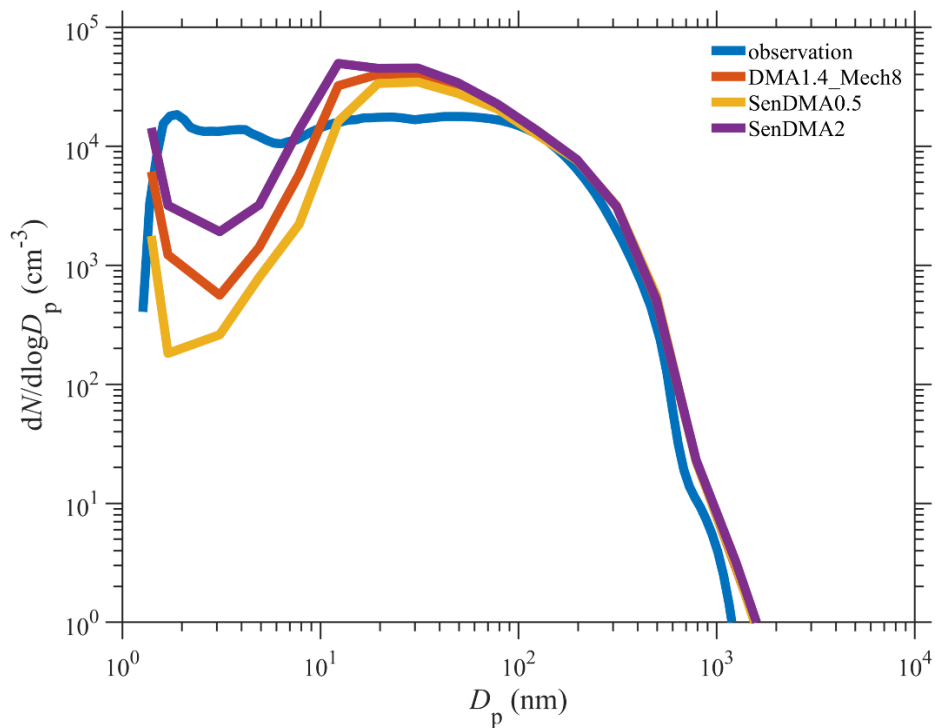

91  
 92 **Figure S10. Comparison of observed and simulated averaged particle number size distribution from sensitivity**  
 93 **scenarios of halving (SenDMA0.5) and doubling (SenDMA2) the DMA emission and the original scenario**  
 94 **(DMA1.4\_Mech8).**

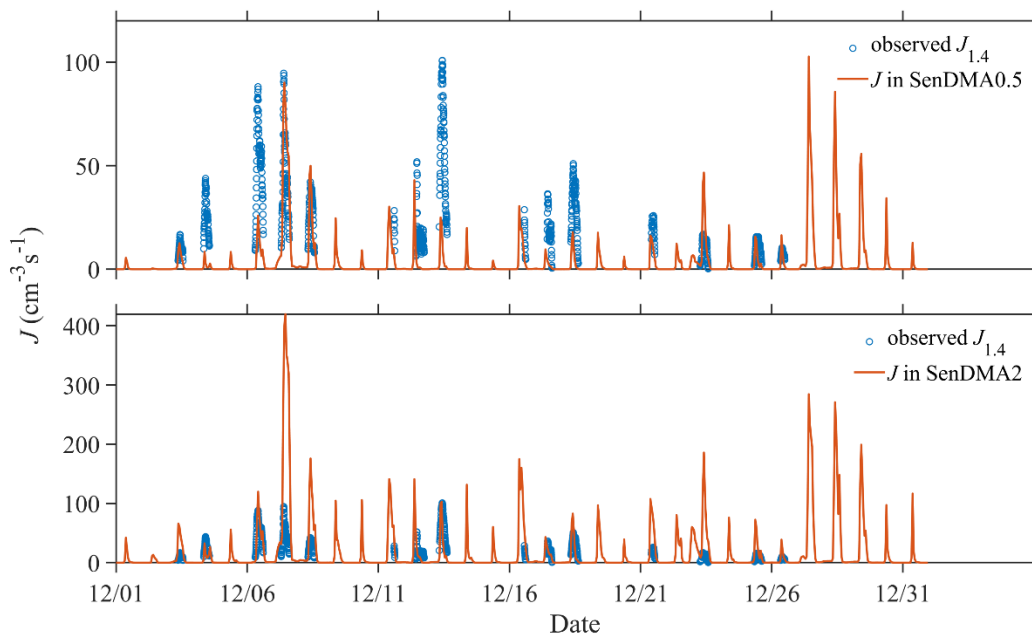

95  
 96 **Figure S11. Comparison of observed  $J_{1.4}$  and simulated nucleation rate from sensitivity scenarios of halving**  
 97 **(SenDMA0.5) (a) and doubling (SenDMA2) (b) the DMA emission.**

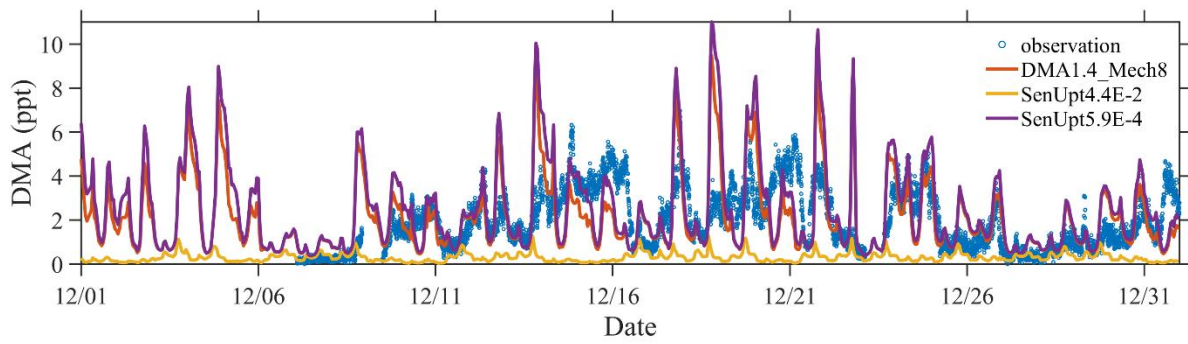

98

99 **Figure S12. Comparison of observed and simulated DMA concentrations from sensitivity scenarios using lowest**  
 100 **(SenUpt5.9E-4) and highest (SenUpt4.4E-2) aerosol uptake coefficient of DMA and the original scenario**  
 101 **(DMA1.4\_Mech8).**

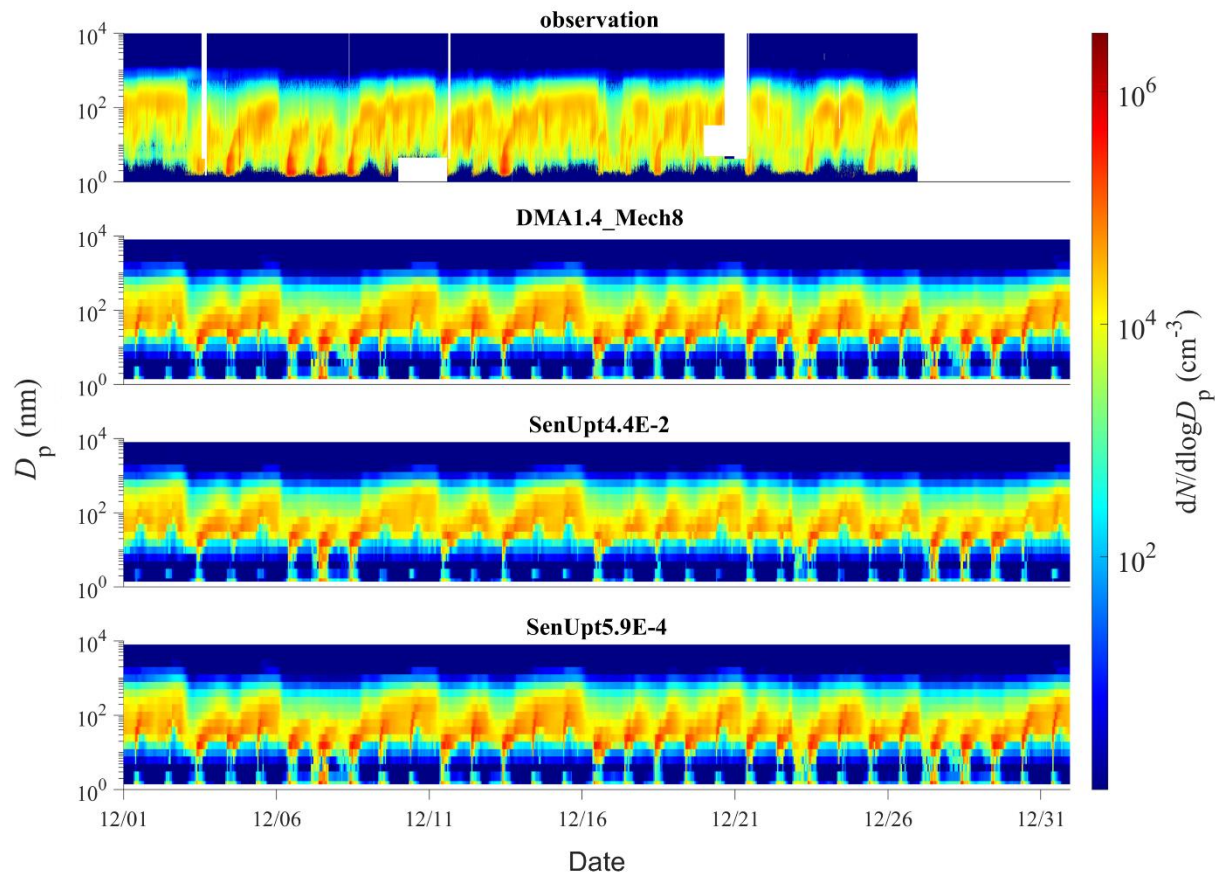

102  
 103 **Figure S13. Comparison of observed and simulated particle number size distribution from sensitivity scenarios using**  
 104 **lowest (SenUpt5.9E-4) and highest (SenUpt4.4E-2) aerosol uptake coefficient of DMA and the original scenario**  
 105 **(DMA1.4\_Mech8).**



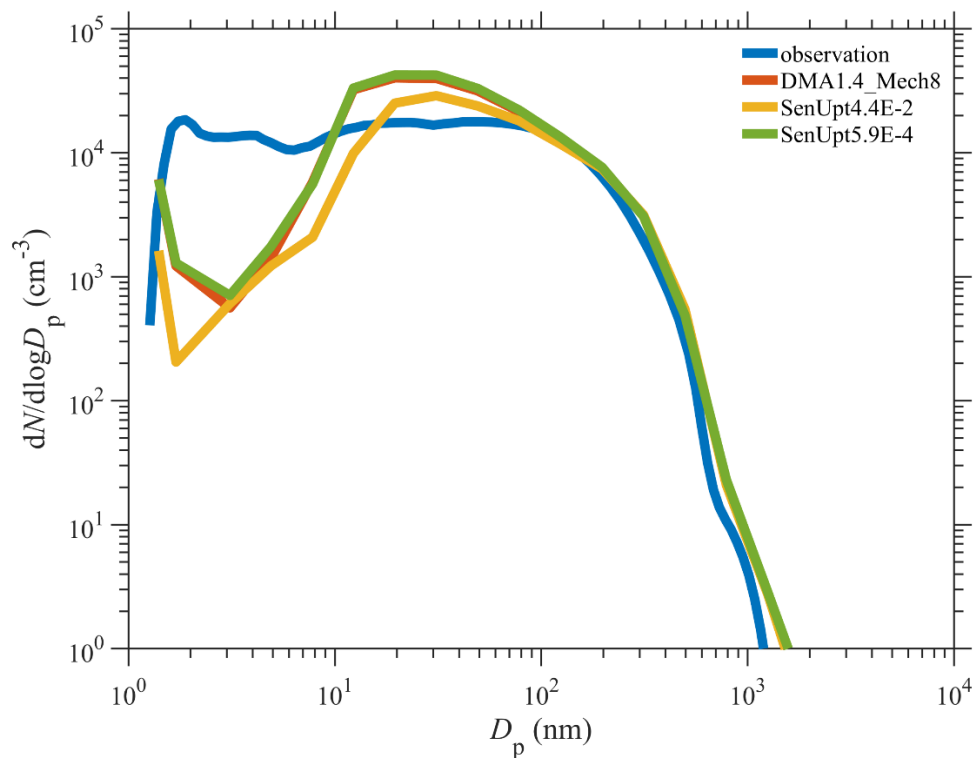

106  
 107 **Figure S14.** Comparison of observed and simulated averaged particle number size distribution from sensitivity  
 108 scenarios using lowest (SenUpt5.9E-4) and highest (SenUpt4.4E-2) aerosol uptake coefficient of DMA and the original  
 109 scenario (DMA1.4\_Mech8).

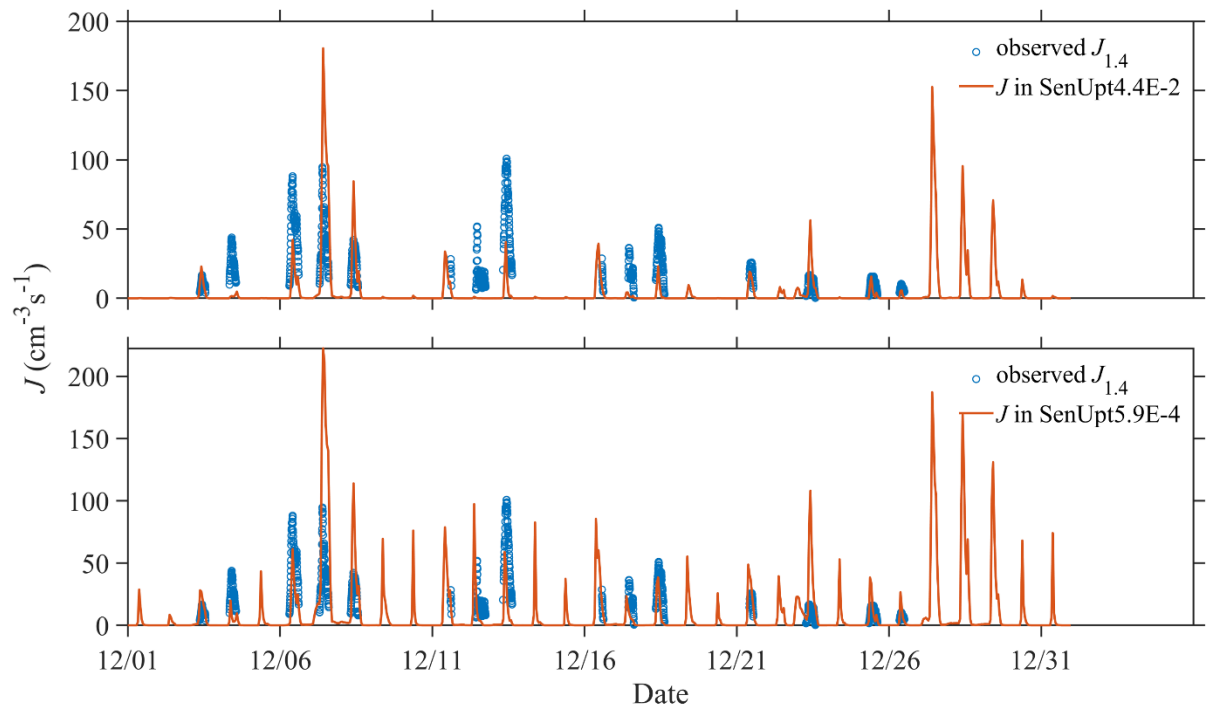

110  
 111 **Figure S15. Comparison of observed  $J_{1.4}$  and simulated nucleation rate from sensitivity scenarios using lowest**  
 112 **(SenUpt5.9E-4) (a) and highest (SenUpt4.4E-2) (b) aerosol uptake coefficient of DMA and the original scenario**  
 113 **(DMA1.4\_Mech8).**

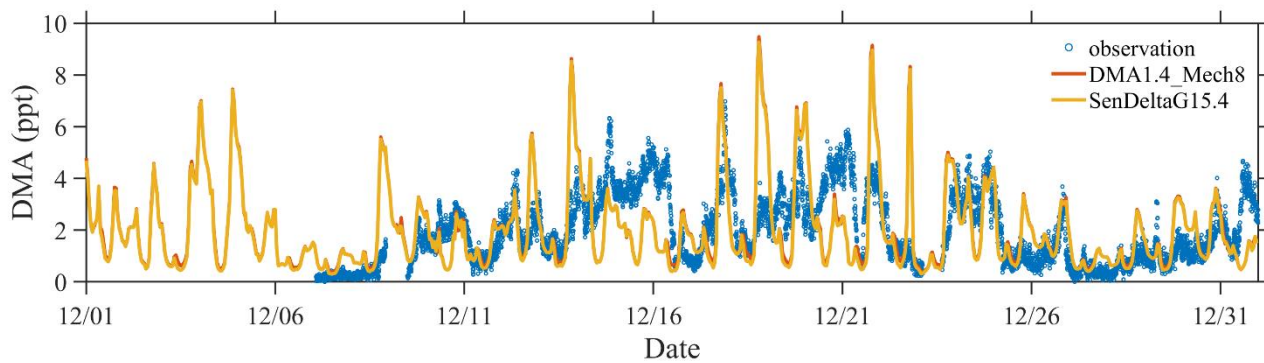

114  
115 **Figure S16. Comparison of observed and simulated DMA concentrations from sensitivity scenarios using  $\Delta G = -15.4$**   
116 **kcal mol<sup>-1</sup> (SenDeltaG15.4) and the original scenario (DMA1.4\_Mech8).**

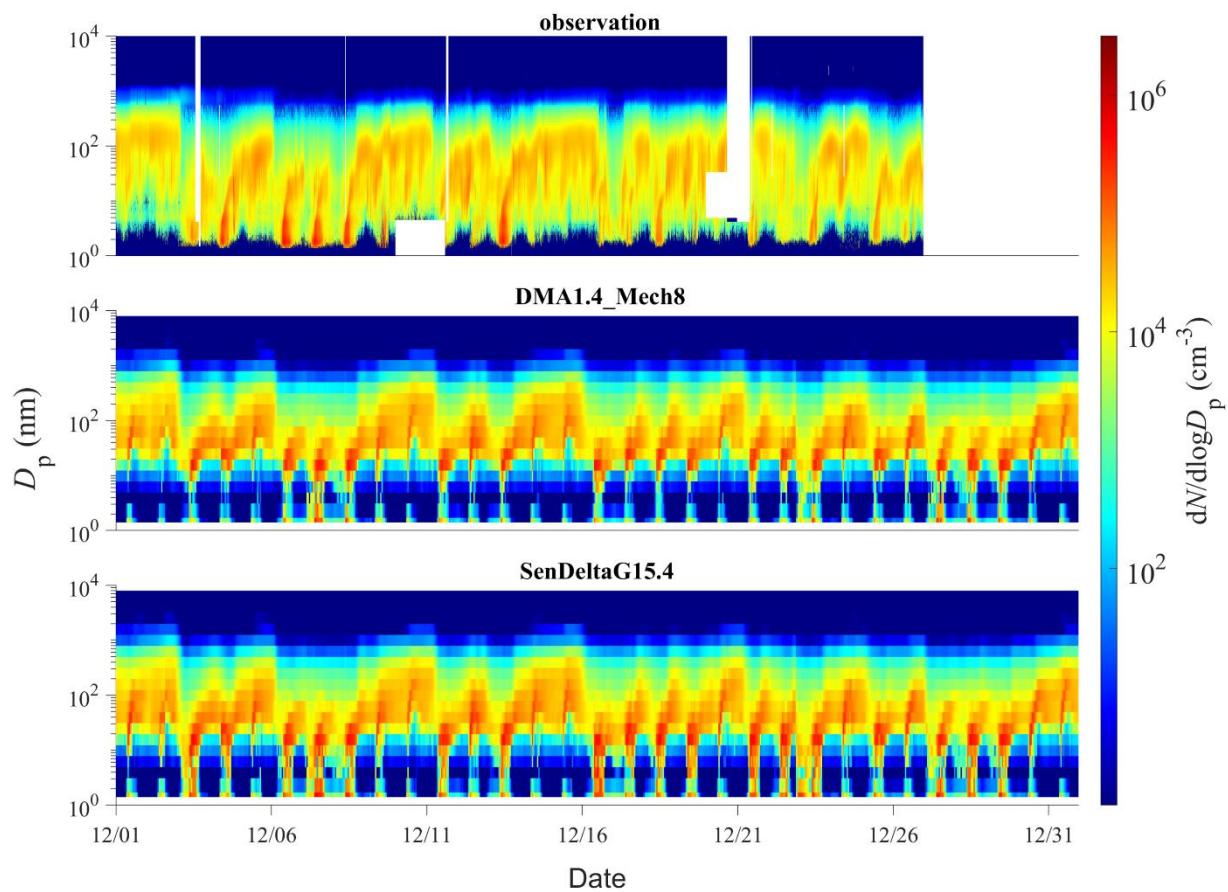

117  
 118 **Figure S17. Comparison of observed and simulated particle number size distribution from sensitivity scenario using**  
 119  **$\Delta G = -15.4 \text{ kcal mol}^{-1}$  (SenDeltaG15.4) and the original scenario (DMA1.4\_Mech8).**

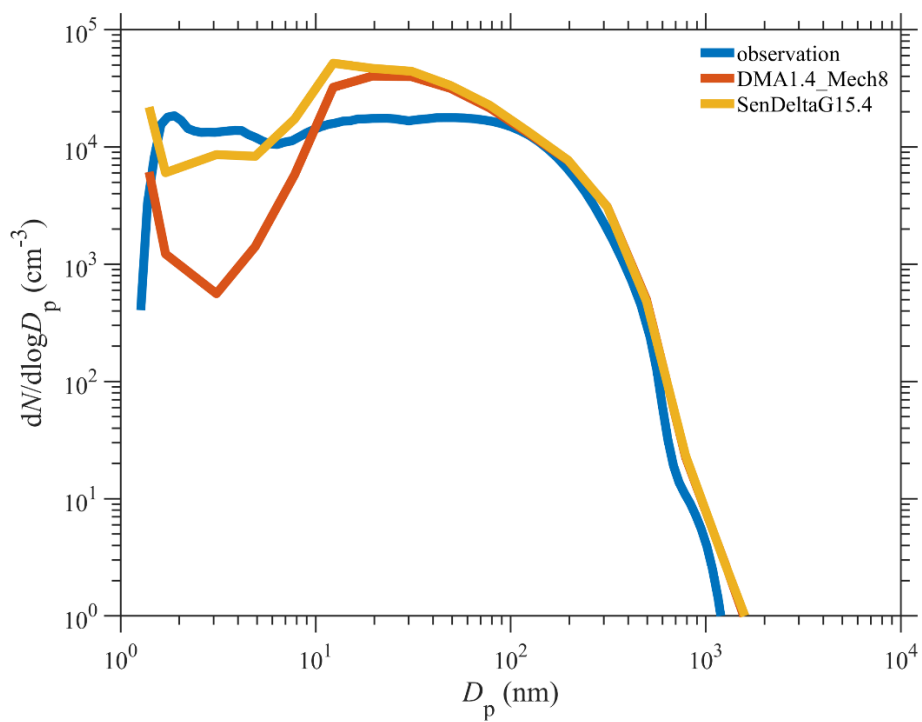

120  
121 **Figure S18. Comparison of observed and simulated averaged particle number size distribution from sensitivity**  
122 **scenarios using  $\Delta G = -15.4 \text{ kcal mol}^{-1}$  (SenDeltaG15.4) and the original scenario (DMA1.4\_Mech8).**

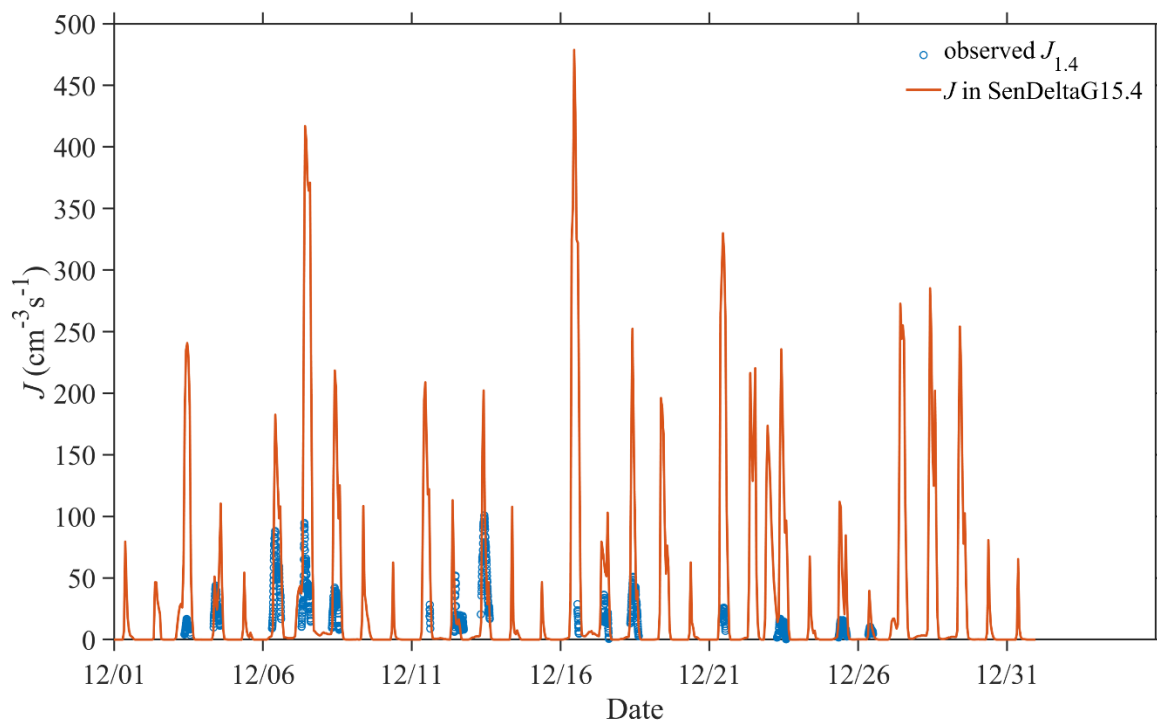

123  
124 **Figure S19. Comparison of observed  $J_{1.4}$  and simulated nucleation rates from sensitivity scenarios using  $\Delta G = -15.4$**   
125 **kcal mol<sup>-1</sup> (SenDeltaG15.4).**

126 **References:**

- 127 Cai, R. L., Yan, C., Yang, D. S., Yin, R. J., Lu, Y. Q., Deng, C. J., Fu, Y. Y., Ruan, J. X., Li, X. X., Kontkanen, J., Zhang,  
128 Q., Kangasluoma, J., Ma, Y., Hao, J. M., Worsnop, D. R., Bianchi, F., Paasonen, P., Kerminen, V. M., Liu, Y. C., Wang,  
129 L., Zheng, J., Kulmala, M., and Jiang, J. K.: Sulfuric acid-amine nucleation in urban Beijing, *Atmos Chem Phys*, 21,  
130 2457-2468, 2021.
- 131 Carl, S. A. and Crowley, J. N.: Sequential Two (Blue) Photon Absorption by NO<sub>2</sub> in the Presence of H<sub>2</sub> as a Source of OH in  
132 Pulsed Photolysis Kinetic Studies: Rate Constants for Reaction of OH with CH<sub>3</sub>NH<sub>2</sub>, (CH<sub>3</sub>)<sub>2</sub>NH, (CH<sub>3</sub>)<sub>3</sub>N, and C<sub>2</sub>H<sub>5</sub>NH<sub>2</sub>  
133 at 295 K, *The Journal of Physical Chemistry A*, 102, 8131-8141, 10.1021/jp9821937, 1998.
- 134 Chen, D., Shen, Y., Wang, J., Gao, Y., Gao, H., and Yao, X.: Mapping gaseous dimethylamine, trimethylamine, ammonia,  
135 and their particulate counterparts in marine atmospheres of China's marginal seas – Part 1: Differentiating marine  
136 emission from continental transport, *Atmos Chem Phys*, 21, 16413-16425, 10.5194/acp-21-16413-2021, 2021.
- 137 Qiu, C., Wang, L., Lal, V., Khalizov, A. F., and Zhang, R.: Heterogeneous reactions of alkylamines with ammonium sulfate  
138 and ammonium bisulfate, *Environ Sci Technol*, 45, 4748-4755, 10.1021/es1043112, 2011.
- 139 Sander, R.: Compilation of Henry's law constants (version 4.0) for water as solvent, *Atmos Chem Phys*, 15, 4399-4981,  
140 10.5194/acp-15-4399-2015, 2015.
- 141 Wang, L., Lal, V., Khalizov, A. F., and Zhang, R.: Heterogeneous Chemistry of Alkylamines with Sulfuric Acid:  
142 Implications for Atmospheric Formation of Alkylammonium Sulfates, *Environmental Science & Technology*, 44, 2461-  
143 2465, 10.1021/es9036868, 2010.
